# Supplementary material for: A one-step hydrothermal preparation strategy for layered BiIO4/Bi2WO6 heterojunctions with enhanced visible light photocatalytic activities
Source: Royal Society of Chemistry journal article supplement (doi:10.1039/c3ra45891a), 2013-12-18
Supplement: c3ra45891a.pdf [file c3ra45891a.pdf]

## Supporting information for

# One-step Hydrothermal Preparation Strategy for Layered BiIO<sub>4</sub>/Bi<sub>2</sub>WO<sub>6</sub> Heterojunctions with Enhanced Visible Light Photocatalytic Activities

**Hongwei Huang\*, Shuobo Wang, Na Tian, Yihe Zhang\***

*National Laboratory of Mineral Materials, School of Materials Science and Technology, China University of Geosciences, Beijing 100083, China*

\*Corresponding author: Hongwei Huang, E-mail: [hhw@cugb.edu.cn](mailto:hhw@cugb.edu.cn). Tel: 86-10-82332247

## Table of Content

1. Figure S1. TEM images of pure  $\text{Bi}_2\text{WO}_6$  samples.
2. Figure S2. The first order kinetics curves for RhB photodegradation over  $\text{BiIO}_4$ ,  $\text{Bi}_2\text{WO}_6$  and  $\text{BiIO}_4/\text{Bi}_2\text{WO}_6$  composites.

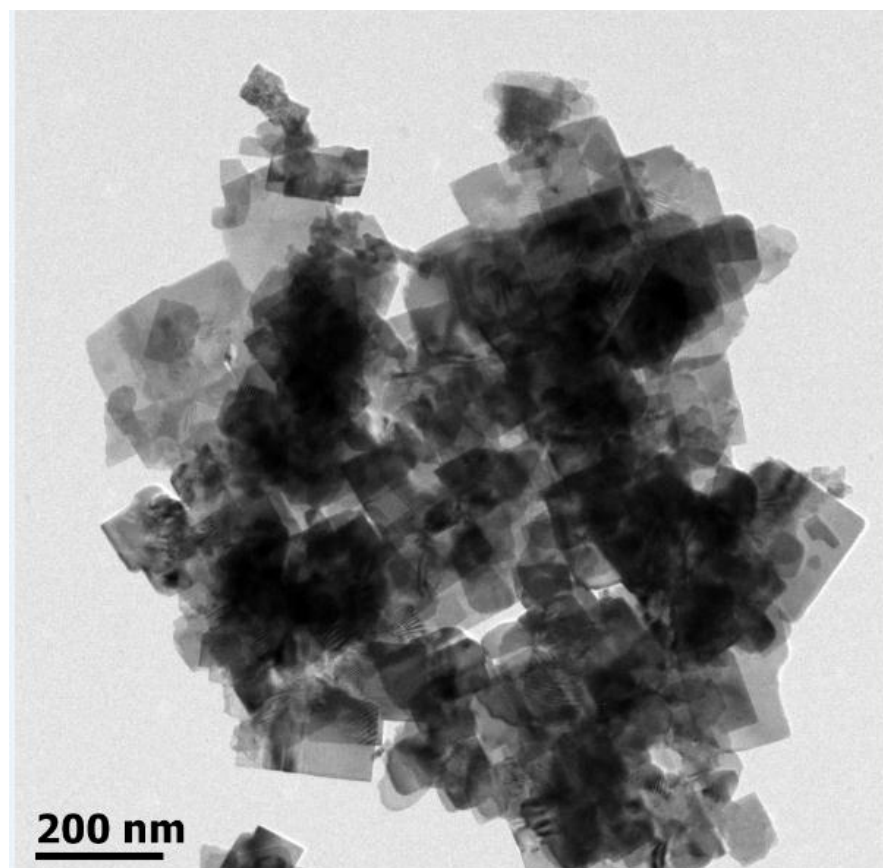

**Fig. S1**

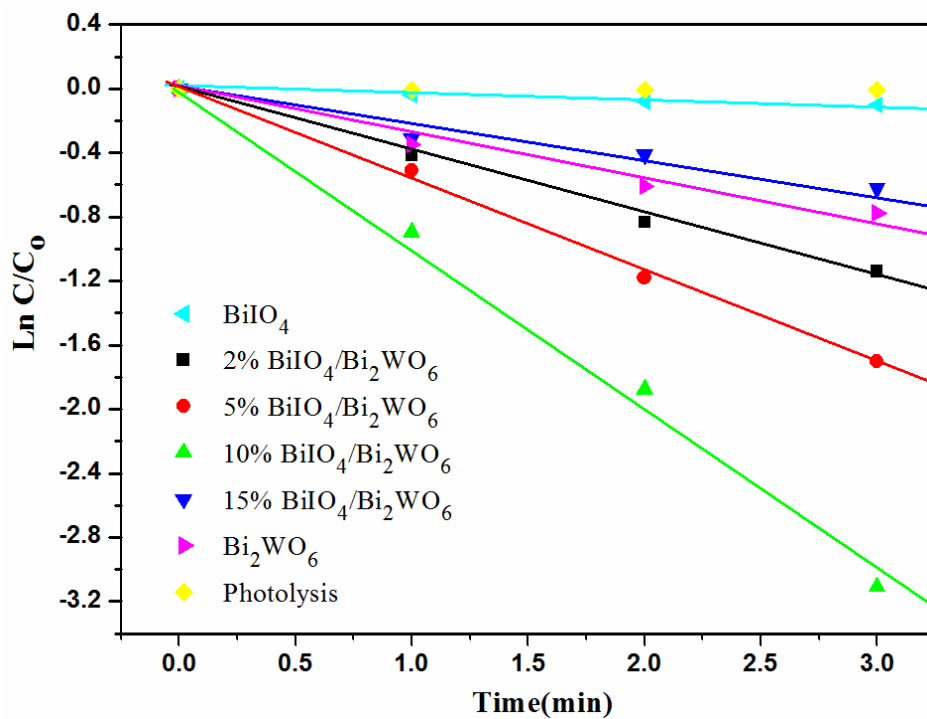

Fig. S2
